# Supplementary material for: Promoting physical activity in rheumatoid arthritis through a physiotherapist led behaviour change-based intervention (PIPPRA): a feasibility randomised trial
Source: Springer Nature journal article supplement (doi:10.1007/s00296-024-05544-1), 2024-03-04
Supplement: MOESM2 [file 26808528]

## PIPPRA RESEARCH STUDY INFORMATION

The PIPPRAs will examine physical activity in people with rheumatoid arthritis (RA). The aim of the study is to work out the practicalities of doing the study before we proceed to do it as a larger study in different rheumatology centres in Ireland. This first step is important to see how the programme works, how easy it is to recruit people with RA to take part and to see what participants think of the intervention and the assessment measures used.

The PIPPRAs project partners include:

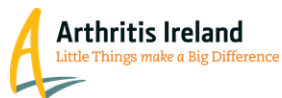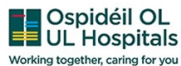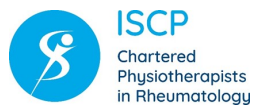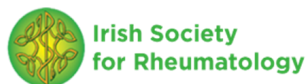

### Contact Details

Phone: 086-8517636

E-mail:  
PIPPRA  
Postdoctoral Researcher

Dr. Louise Larkin

[Louise.Larkin@ul.ie](mailto:Louise.Larkin@ul.ie)

Health Research Institute  
Clinical Education and Research  
Centre  
University Hospital Limerick  
Dooradoyle  
Limerick

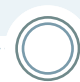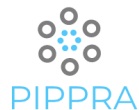

# Physical Activity Information Leaflet

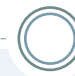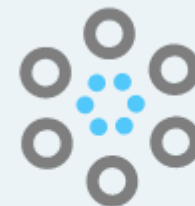

# PIPPRA

*Physiotherapist led Intervention  
to Promote Physical activity in  
Rheumatoid Arthritis - a pilot study*

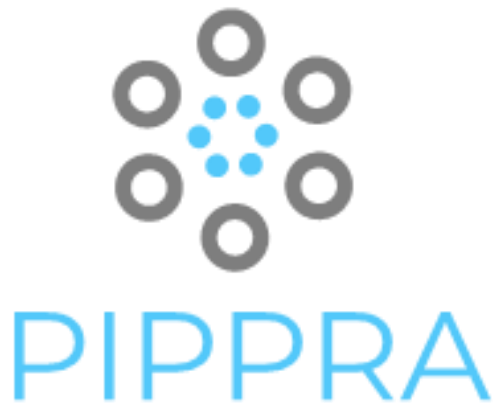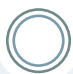

## PIPPRA Project

The **PIPPRA** project is part of Arthritis Research Limerick, a group of researchers and clinicians based at the University of Limerick and University Hospitals Limerick. The PIPPPRA project is funded by the **Health Research Board**.

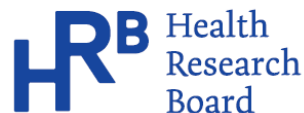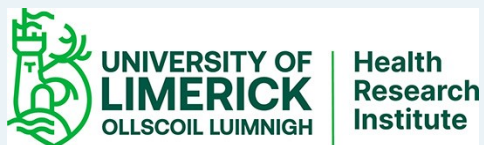

## PHYSICAL ACTIVITY

Physical activity is an important part in managing your arthritis and is proven to have many benefits in managing arthritis. This includes helping to manage your arthritis symptoms, such as pain, and improving your mental and physical health. Being physically active can improve your joint movement, muscle strength and heart health. It can also help with weight management, which reduces your risk of other health conditions, such as diabetes or stroke.

Physical activity is any bodily movement that uses energy. Examples include climbing the stairs, cleaning, walking in shops and lots of other daily activities.

Exercise is a subset of physical activity. It's a type of physical activity that is planned, structured and is for the purpose of improving your physical fitness.

### Physical Activity Recommendations

The European League Against Rheumatism 2018 guidelines for people who have rheumatoid arthritis advise the following:

#### Cardiorespiratory/Aerobic Exercise

Moderate intensity aerobic physical activity for at least 30 minutes on 5 days per week

or

vigorous intensity aerobic activity for a minimum of 20 minutes on 3 days per week.

Talk test

The talk test can help to figure out how what intensity you are exercising at. At **low intensity** you can talk and sing a song, at **moderate intensity** you can have a conversation but can't sing a song, whereas when exercising at a **vigorous intensity** you can't have a conversation.

### PHYSICAL ACTIVITY

#### Strength/Resistance Exercise

Strength exercises for each major muscle group should be trained on 2–3 days per week. Major muscle groups include the thigh muscles, buttock muscles, and arm muscles. A variety of exercise equipment and/or body weight can be used to perform these exercises.

#### Flexibility Exercise

Flexibility exercises include stretching and mobility exercises. Flexibility exercises should be completed on 2–3 days per week.

#### Neuromotor Exercise

Neuromotor exercise includes balance, agility, and coordination. Neuromotor exercises should be completed on 2–3 days per week.

### Type of Physical Activity

Here are some examples of the different types of exercise!

#### Cardiorespiratory/Aerobic Exercise

Walking, jogging, swimming, cycling

#### Strength/Resistance Exercise

Squats, lunges, arms exercises using a light weight, e.g. bottle of water

#### Flexibility Exercise

Yoga, stretching, joint range of motion exercises

#### Neuromotor Exercise

Balance exercises, Tai chi
