# Supplementary material for: Promoting physical activity in rheumatoid arthritis through a physiotherapist led behaviour change-based intervention (PIPPRA): a feasibility randomised trial
Source: Springer Nature journal article supplement (doi:10.1007/s00296-024-05544-1), 2024-03-04
Supplement: MOESM3 [file 26808528]

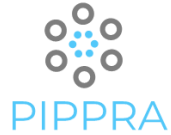

## Intervention detail log sheet

|                                                                                        |                                                        |
|----------------------------------------------------------------------------------------|--------------------------------------------------------|
| <b>Date:</b>                                                                           | <b>Session No:</b>                                     |
| <b>Start Time:</b> <b>Finish time:</b>                                                 | <b>Delivery Mode:</b>                                  |
| <b>Participant Name:</b>                                                               | <b>Physiotherapist:</b>                                |
| <b>Physical activity prescription:</b>                                                 |                                                        |
| <b>Aerobic</b> <input type="checkbox"/>                                                | <b>Flexibility</b> <input type="checkbox"/>            |
| <b>Strengthening</b> <input type="checkbox"/>                                          | <b>Balance/Proprioceptive</b> <input type="checkbox"/> |
| <b>Physical activity prescription details (Record F.I.T.T. details)</b>                |                                                        |
| <br><br><br><br><br><br><br><br><br><br>                                               |                                                        |
| <b>Behaviour Change Techniques details (see BCT Taxonomy)</b>                          |                                                        |
| <br><br><br><br><br><br><br><br><br><br>                                               |                                                        |
| <b>Adverse event(s)</b><br>Yes <input type="checkbox"/><br>No <input type="checkbox"/> | <b>Adverse event(s) details</b>                        |
| <b>Additional information</b>                                                          |                                                        |
| <br><br><br><br><br><br><br><br><br><br>                                               |                                                        |
